# Supplementary material for: Prebiotic Galacto-Oligosaccharides Impact Stool Frequency and Fecal Microbiota in Self-Reported Constipated Adults: A Randomized Clinical Trial
Source: MDPI journal article supplement (doi:10.3390/nu14020309), 2022-01-12
Supplement: s1 [file s1]

## Supplementary Materials

| Activities                                                                                                                                                                                                  | Screening | Visit 1 | Baseline week |    |    |    |    |    |    | Run-in period |   |   |   | Intervention period |   |   |   |   |    |    |    |    |    |    |    |    |    | Visit 2 |    |    |    |    |    |    |    |  |   |
|-------------------------------------------------------------------------------------------------------------------------------------------------------------------------------------------------------------|-----------|---------|---------------|----|----|----|----|----|----|---------------|---|---|---|---------------------|---|---|---|---|----|----|----|----|----|----|----|----|----|---------|----|----|----|----|----|----|----|--|---|
| Day                                                                                                                                                                                                         | < -7      | -7      | -7            | -6 | -5 | -4 | -3 | -2 | -1 | 1             | 2 | 3 | 4 | 5                   | 6 | 7 | 8 | 9 | 10 | 11 | 12 | 13 | 14 | 15 | 16 | 17 | 18 | 19      | 20 | 21 | 22 | 23 | 24 | 25 | 26 |  |   |
| Screening                                                                                                                                                                                                   |           |         |               |    |    |    |    |    |    |               |   |   |   |                     |   |   |   |   |    |    |    |    |    |    |    |    |    |         |    |    |    |    |    |    |    |  |   |
| Informed consent                                                                                                                                                                                            | x         |         |               |    |    |    |    |    |    |               |   |   |   |                     |   |   |   |   |    |    |    |    |    |    |    |    |    |         |    |    |    |    |    |    |    |  |   |
| Screening questionnaire                                                                                                                                                                                     | x         |         |               |    |    |    |    |    |    |               |   |   |   |                     |   |   |   |   |    |    |    |    |    |    |    |    |    |         |    |    |    |    |    |    |    |  |   |
| Medical history                                                                                                                                                                                             | x         |         |               |    |    |    |    |    |    |               |   |   |   |                     |   |   |   |   |    |    |    |    |    |    |    |    |    |         |    |    |    |    |    |    |    |  |   |
| Fiber intake FFQ                                                                                                                                                                                            | x         |         |               |    |    |    |    |    |    |               |   |   |   |                     |   |   |   |   |    |    |    |    |    |    |    |    |    |         |    |    |    |    |    |    |    |  |   |
| Visit at study site                                                                                                                                                                                         |           |         |               |    |    |    |    |    |    |               |   |   |   |                     |   |   |   |   |    |    |    |    |    |    |    |    |    |         |    |    |    |    |    |    |    |  |   |
| Provision study products                                                                                                                                                                                    |           | x       |               |    |    |    |    |    |    |               |   |   |   |                     |   |   |   |   |    |    |    |    |    |    |    |    |    |         |    |    |    |    |    |    |    |  |   |
| Provision fecal sample collection kits                                                                                                                                                                      |           | x       |               |    |    |    |    |    |    |               |   |   |   |                     |   |   |   |   |    |    |    |    |    |    |    |    |    |         |    |    |    |    |    |    |    |  |   |
| Weight, height, waist and hip circumference                                                                                                                                                                 |           | x       |               |    |    |    |    |    |    |               |   |   |   |                     |   |   |   |   |    |    |    |    |    |    |    |    |    | x       |    |    |    |    |    |    |    |  |   |
| Intake remaining study products                                                                                                                                                                             |           |         |               |    |    |    |    |    |    |               |   |   |   |                     |   |   |   |   |    |    |    |    |    |    |    |    |    | x       |    |    |    |    |    |    |    |  |   |
| Intake fecal samples                                                                                                                                                                                        |           |         |               |    |    |    |    |    |    |               |   |   |   |                     |   |   |   |   |    |    |    |    |    |    |    |    |    | x       |    |    |    |    |    |    |    |  |   |
| Study specific outcomes                                                                                                                                                                                     |           |         |               |    |    |    |    |    |    |               |   |   |   |                     |   |   |   |   |    |    |    |    |    |    |    |    |    |         |    |    |    |    |    |    |    |  |   |
| Weekly questionnaire<br>- Stool frequency<br>- Stool consistency (Bristol Stool Chart)<br>- Bloating<br>- Changes in daily habits: fluid intake, smoking, alcohol use, physical activity, medication intake |           |         |               |    |    |    |    |    |    | x             |   |   |   |                     |   |   |   |   |    |    |    | x  |    |    |    |    |    |         |    | x  |    |    |    |    |    |  |   |
| PAC-SYM questionnaire                                                                                                                                                                                       |           |         |               |    |    |    |    |    |    | x             |   |   |   |                     |   |   |   |   |    |    |    |    |    |    |    |    |    |         | x  |    |    |    |    |    |    |  |   |
| Constipation Scoring System questionnaire                                                                                                                                                                   |           |         |               |    |    |    |    |    |    | x             |   |   |   |                     |   |   |   |   |    |    |    |    |    |    |    |    |    |         | x  |    |    |    |    |    |    |  |   |
| Fecal sample collection                                                                                                                                                                                     |           |         |               |    |    |    |    |    |    | x             |   |   |   |                     |   |   |   |   |    |    |    |    |    |    |    |    |    |         | x  |    |    |    |    |    |    |  |   |
| Monitoring                                                                                                                                                                                                  |           |         |               |    |    |    |    |    |    |               |   |   |   |                     |   |   |   |   |    |    |    |    |    |    |    |    |    |         |    |    |    |    |    |    |    |  |   |
| Study product intake                                                                                                                                                                                        |           |         |               |    |    |    |    |    |    |               |   |   |   |                     |   |   |   |   |    |    | x  |    |    |    |    |    |    |         | x  |    |    |    |    |    |    |  | x |
| Adverse Events/Serious Adverse Events                                                                                                                                                                       | x         | x       | x             | x  | x  | x  | x  | x  | x  | x             | x | x | x | x                   | x | x | x | x | x  | x  | x  | x  | x  | x  | x  | x  | x  | x       | x  | x  | x  | x  | x  |    |    |  |   |

**Figure S1.** Schedule of Assessment.

**Table S1.** Baseline characteristics of subgroups based on age in ITT Population (in mean  $\pm$  SD or median, IQR).

|                               | <35 years of age | $\geq 35$ years of age |
|-------------------------------|------------------|------------------------|
| n                             | 50               | 82                     |
| Gender (% female)             | 92.0%            | 95.1%                  |
| Age (years)                   | 24.7 $\pm$ 4.5   | 46.6 $\pm$ 6.4         |
| BMI (kg/m <sup>2</sup> )      | 23.3 $\pm$ 2.2   | 24.0 $\pm$ 2.3         |
| Weight (kg)                   | 70.2, 11.0       | 71.1 $\pm$ 8.7         |
| Waist circumference           | 82.2 $\pm$ 8.6   | 88.0 $\pm$ 8.3         |
| Hip circumference             | 102.8 $\pm$ 6.6  | 103.0 $\pm$ 6.2        |
| Fiber intake category (% low) | 56.0%            | 61.0%                  |
| Stool frequency               | 3.0, 1           | 3.0, 2                 |
| Stool consistency             | 3.1 $\pm$ 1.3    | 2.3, 1.3               |

**Table S2.** Baseline characteristics of responders and non-responders in the ITT Population (in mean  $\pm$  SD or median, IQR). Initial responders: subjects with an increase in stool frequency in week 1. Consistent responders: subjects with an increase in stool frequency at week 1 still present at week 3.

|                               | Initial responders |                 | Consistent responders |                 |
|-------------------------------|--------------------|-----------------|-----------------------|-----------------|
|                               | yes                | no              | yes                   | no              |
| n                             | 49                 | 83              | 60                    | 72              |
| Gender (% female)             | 91.6%              | 98.0%           | 90.0%                 | 97.2%           |
| Age (years)                   | 39.0, 25           | 43.0, 17        | 37.5, 24              | 43.0, 21        |
| BMI (kg/m <sup>2</sup> )      | 23.8 $\pm$ 2.3     | 23.5 $\pm$ 2.4  | 23.8 $\pm$ 2.3        | 23.6 $\pm$ 2.3  |
| Weight (kg)                   | 72.0 $\pm$ 9.8     | 69.6 $\pm$ 8.3  | 72.2 $\pm$ 9.7        | 70.2 $\pm$ 8.9  |
| Waist circumference           | 86.0 $\pm$ 9.1     | 85.5 $\pm$ 8.4  | 86.4 $\pm$ 9.1        | 85.3 $\pm$ 8.7  |
| Hip circumference             | 103.0 $\pm$ 6.6    | 102.8 $\pm$ 5.9 | 103.4 $\pm$ 6.6       | 102.5 $\pm$ 6.1 |
| Fiber intake category (% low) | 59.0%              | 59.2%           | 56.7%                 | 61.1%           |
| Stool frequency               | 2.8 $\pm$ 1.3      | 3.5 $\pm$ 1.7   | 2.0, 1                | 3.0, 2          |
| Stool consistency             | 2.7, 1.8           | 2.5, 1.4        | 2.5, 1.5              | 2.5, 1.3        |
